# Supplementary material for: Hematologic complications with age in Shwachman-Diamond syndrome
Source: PubMed Central journal article supplement — Blood Adv. 2022 Jan 11;6(1):297–306. doi: 10.1182/bloodadvances.2021005539 (PMC8753194; doi:10.1182/bloodadvances.2021005539), 2022-01-11
Supplement: advancesADV2021005539-suppl1.pdf [file advancesADV2021005539-suppl1.pdf]

**Supplemental Table 1. Biallelic SBDS Sequence Variants in this Cohort of Subjects with SDS**

| # of Subjects | DNA change                          |                                    | mRNA/Protein change                 |                                     | mRNA/Protein change Class |                              | # of subjects per category |
|---------------|-------------------------------------|------------------------------------|-------------------------------------|-------------------------------------|---------------------------|------------------------------|----------------------------|
|               | Allele 1                            | Allele 2                           | Allele 1                            | Allele 2                            | Allele 1                  | Allele 2                     |                            |
| 95            | c.258+2T>C                          | c.183_184delTAinsCT                | IVS2 splice donor+2                 | Lys62*                              | splice                    | stop                         | 116                        |
| 2             |                                     | c.184A>T                           |                                     | Lys62*                              |                           |                              |                            |
| 2             |                                     | c.652C>T                           |                                     | Arg218*                             |                           |                              |                            |
| 1             |                                     | c.25C>T                            |                                     | Gln9*                               |                           |                              |                            |
| 7             |                                     | c.258+2T>C;<br>c.183_184delTAinsCT |                                     | IVS2 splice donor+2; Lys62*         |                           | splice and stop              |                            |
| 2             |                                     | c.120delIG                         |                                     | Ser41AlafsX18                       |                           | frameshift                   |                            |
| 2             |                                     | c.523delIC                         |                                     | Arg175GlyfsX12                      |                           |                              |                            |
| 1             |                                     | c.18delIC                          |                                     | Thr7ProfsX6                         |                           |                              |                            |
| 1             |                                     | c.107delIT                         |                                     | Val36AlafsX23                       |                           |                              |                            |
| 1             |                                     | c.119delIG                         |                                     | Ser41AlafsX18                       |                           |                              |                            |
| 1             |                                     | c.123delIC                         |                                     | Ser41ArgfsX18                       |                           |                              |                            |
| 1             |                                     | c.297_300delAAGA                   |                                     | Glu99AspfsX21                       |                           |                              |                            |
| 15            |                                     | c.258+2T>C (homozygous)            |                                     | IVS2 splice donor+2 (homozygous)    |                           | splice (homozygous)          |                            |
| 6             | c.258+2T>C                          | c.258+1G>C                         | IVS2 splice donor+2                 | IVS2 splice donor +1                | splice                    | compound heterozygous splice | 9                          |
| 1             |                                     | c.259-2A>G                         |                                     | IVS2 splice acceptor-2              |                           |                              |                            |
| 1             |                                     | c.460-1G>A                         |                                     | IVS3 splice acceptor-1              |                           |                              |                            |
| 1             |                                     | c.624+1G>A                         |                                     | IVS4 splice donor +1                |                           |                              |                            |
| 2             | c.258+2T>C                          | c.250T>C                           | IVS2 splice donor+2                 | Cys84Arg                            | splice                    | missense                     | 15                         |
| 2             |                                     | c.355T>C                           |                                     | Cys119Arg                           |                           |                              |                            |
| 2             |                                     | c.505C>T                           |                                     | Arg169Cys                           |                           |                              |                            |
| 2             |                                     | c.653G>A                           |                                     | Arg218Gln                           |                           |                              |                            |
| 1             |                                     | c.3G>A                             |                                     | Met1Ile <sup>#</sup>                |                           |                              |                            |
| 1             |                                     | c.41A>G                            |                                     | Asn14Ser                            |                           |                              |                            |
| 1             |                                     | c.95A>G                            |                                     | Tyr32Cys                            |                           |                              |                            |
| 1             |                                     | c.169T>C                           |                                     | Phe57Leu                            |                           |                              |                            |
| 1             |                                     | c.170T>C                           |                                     | Phe57Ser                            |                           |                              |                            |
| 1             |                                     | c.458A>G                           |                                     | Gln153Arg                           |                           |                              |                            |
| 1             |                                     | c.641C>T                           |                                     | Pro214Leu                           |                           |                              |                            |
| 1             |                                     | c.258+2T>C                         |                                     | deletion chr7:66,448,591-66,463,734 |                           |                              |                            |
| 1             | deletion chr7:66,450,964-66,454,945 |                                    | deletion chr7:66,450,964-66,454,945 |                                     |                           |                              |                            |
| 1             | deletion 7q11.21q11.22              |                                    | deletion 7q11.21q11.22              |                                     |                           |                              |                            |
| 1             | c.183_184delTAinsCT                 | c.523C>T                           | Lys6*                               | Arg175Trp                           | stop                      | missense                     | 1                          |

<sup>#</sup> Start codon variant

**Supplemental Table 2. Disease Characteristics and Outcomes of subjects with SDS and MDS or AML**

| Patient number | Sex | Age at MDS/AML diagnosis | Cytogenetics                                                                                                                                                                                                                                                                                                                                                                                                                   | Blast % IHC (^Flow) | Initial therapy | Survival           |
|----------------|-----|--------------------------|--------------------------------------------------------------------------------------------------------------------------------------------------------------------------------------------------------------------------------------------------------------------------------------------------------------------------------------------------------------------------------------------------------------------------------|---------------------|-----------------|--------------------|
| <b>AML</b>     |     |                          |                                                                                                                                                                                                                                                                                                                                                                                                                                |                     |                 |                    |
| 42             | F   | 14.76                    | 43-46,XX,-5,-6,-8,add(20)9q13.3),add(21)(11.1),-22,del(22)(q12),+1-4mar[cp20] del5d, del20q and del8q by FISH                                                                                                                                                                                                                                                                                                                  | not available       | Chemo           | Deceased           |
| 16             | F   | 39.07                    | 46,XX,add(3)(q27),del(8)(q13q22),der(10)t(10;15)(p11.2q15)[1], 43-44,der(2)t(2;12)(q33;q13),add(3)(q27),add(4)(q21),-5,-6,add(6)(q25),-7,del(8)(q13q22),-11,-12,der(18)t(11;19)(q13;p13.3)+2-3mar[6], 46,XX[13]                                                                                                                                                                                                                | 25(19)              | Chemo           | Deceased           |
| 43             | M   | 19.53                    | 47,XY,+21,dic(21;21)(p11.2;p11.2),dic(22;22)(p11.2;p11.2),+2mar [1]/ 47-48,sl,-16,+1-2mar[cp13][13] / 47,sl,del(6)(q21q27),dic(13;16)(p13.p11.2),+mar[3] / 48,sl,-18,+2mar [1]/42,XY,-8,-10,-14,-18,dic(21;21)(p11.2;p11.2),dic(21;22)(p11.2,p11.2),+mar[1]/46,XY[1]                                                                                                                                                           | 34(20)              | Chemo           | Deceased           |
| 44             | F   | 22.97                    | 47-48,XX,add(5)(q14)[5],add(7)(q22)[5],+16[8],add(19)(q13.3)[7],-20[4], del(20)(q11.2q13.1)[5],+21[13], add(21)(p11.2)x2[12], +add(21)(p11.2)[4][cp4]/46,XX[6]. Del20q and del7q by FISH                                                                                                                                                                                                                                       | 60-70 (10)          | HSCT            | Deceased           |
| 45             | F   | 37.88                    | 44,XX,add(2)(q35),del(5)(q22q35),add(6)(p21.3),del(7)(q11.2),-9,del(12)(p11.2p13),-13,add(15)(p11.2)[2] / 44,XX,add(2)(q35),der(3;7)(q10;q10),-5,add(6)(p21.3), der(9;12)(q10;q10),add(15)(p11.2),+mar1[9] / 44,XX,+1,idel(1)(p13), add(2)(q35), der(3;7)(q10;q10),-5,add(6)(p21.3),der(9;12), (q10;q10),add(15)(p11.2),+mar1[2] / 46,XX [6] . Mosaic 5 and 7 by FISH                                                          | 20 (31)             | Chemo           | Deceased           |
| 46             | F   | 36.96                    | not available                                                                                                                                                                                                                                                                                                                                                                                                                  | not available       | Chemo           | Deceased           |
| 47             | F   | 47.34                    | 46,XX,del(5)(q11.2q33),add(22)(q13)[9]/46-49, idem, add(3)(p14),add(13)(p11.2),+19,der(20)t(3;20)(p14.q11.2),-21,+mar13[cp6]/46,XX[3]. Del5q, del20q, del21 by FISH                                                                                                                                                                                                                                                            | 30-40(30)           | Chemo           | Deceased           |
| 48             | M   | 14.44                    | 46,XY[20]                                                                                                                                                                                                                                                                                                                                                                                                                      | 56 (73)             | Chemo           | Alive in remission |
| 49             | M   | 29.17                    | 46,XY,add(2)(q12-14),-5,r(11)(p11.2q23),+der(15)t(5;15)(p13;q22)[4]/46-48,sl,-add(2)(q12-14),+2,-3,del(7)(q21),-r(11)(p11.2q23),+der(11)add(11)(p11.2)hsr(11)(q23),+del(19)(p13.1p13.3),+r,+mar1[cp6]/47,sl,-Y,add(X)(p11.2),-add(2)(q12-14),+2,add(10)(q26),-r(11)(p11.1q23),+dic r(11;11)(p11.2q23;p.11.2q23),+13,-der(15)t(5;15)(p13;q22),+del(19)(p13.1p13.3),+mar2[8]/46,XY,ins(5;?)(p13;?) [5] ; del5q and del7q by FISH | 52 (57)             | Chemo           | Deceased           |
| 7              | M   | 27.7                     | not available                                                                                                                                                                                                                                                                                                                                                                                                                  | 20-40               | Chemo           | Deceased           |
| <b>MDS</b>     |     |                          |                                                                                                                                                                                                                                                                                                                                                                                                                                |                     |                 |                    |
| 50             | M   | 10.75                    | 42/R/44,XY,der(5)del(5)(q15q33)psu dic(5;12)(q35;p13), -7[cp19]/46, Xy[1]; monosomy 5 and 7 by FISH                                                                                                                                                                                                                                                                                                                            | 5                   | HSCT            | Deceased           |
| 51             | F   | 0.48                     | not available                                                                                                                                                                                                                                                                                                                                                                                                                  | 0                   | HSCT            | Alive              |
| 22             | M   | 4.82                     | 47,XYc,del(20)(q11.2q13.2)[15]/47,XYc[5]. Del20q by FISH                                                                                                                                                                                                                                                                                                                                                                       | 0                   | HSCT            | Alive              |
| 52             | F   | 45.05                    | 46,XX,der(7)t(1;7)(q12;q11.2)[4]/46,XX[16]                                                                                                                                                                                                                                                                                                                                                                                     | 0                   | <b>None</b>     | Deceased           |
| 53             | F   | 21.27                    | 46, XX [20]; trisomy 8 by FISH                                                                                                                                                                                                                                                                                                                                                                                                 | 1 (0.5)             | HSCT            | Deceased           |
| 25             | M   | 5.43                     | 46, XY, del(20)(q11.2q13.1)[10]/46,XY,add(7)(q22)[7]/45, XY-7[3]                                                                                                                                                                                                                                                                                                                                                               | not available       | HSCT            | Alive              |
| 54             | M   | 10.34                    | 46,XY,i(7)9q10[10]/46,XY[1]. Trisomy 7q by FISH, low level del20q by FISH                                                                                                                                                                                                                                                                                                                                                      | 2                   | HSCT            | Alive              |
| 14             | M   | 2.19                     | 46, XY, +der(1;17)(q10;q10)[18]/46, XY[2]                                                                                                                                                                                                                                                                                                                                                                                      | 1(3)                | HSCT            | N/A                |

|    |   |       |                                                                                                                                                                                                                        |               |       |          |
|----|---|-------|------------------------------------------------------------------------------------------------------------------------------------------------------------------------------------------------------------------------|---------------|-------|----------|
| 4  | F | 13.84 | 46,XX,der(3;6)(q25;q13)[20]/45, dic(6;7)(q13;p11.2)[4]/46,XX[1]. Add 3q27 by FISH                                                                                                                                      | 5(3)          | Chemo | Deceased |
| 55 | M | 9.39  | 92, XXYY, add(7)9q32)x2, add(9)9q21)[5]/46,XY[15]                                                                                                                                                                      | 16(3)         | HSCT  | Alive    |
| 56 | F | 22.57 | not available                                                                                                                                                                                                          | not available | Chemo | Deceased |
| 33 | F | 30.15 | 46XX,del(20)(q11.2q13.3)[9]/46,XX[11]                                                                                                                                                                                  | 1             | HSCT  | Alive    |
| 57 | F | 18.62 | 44,XX,-5,-7,del(9)(p22),der(13)r(13:13)(?p13q34;q12q34),-18,+mar1-3,2dmin[3]/44idem,add(3)(q27),-15,+mar1,+mar2,+mar3[7]/43,idem,der(6)dic(6,-17)(p?23;p13),-17[6]                                                     | not available | Chemo | Deceased |
| 58 | M | 18.03 | not available                                                                                                                                                                                                          | not available | HSCT  | Deceased |
| 37 | M | 21.47 | 46XY[5]/46, XY, del(12)(p11.1)[5]/35,idem,del(5)(q?22q?31),-7,del(9)(q21)[3]/44, idem, add(1)(p32),add(3)(p24),-5,-7,del(9)(q21)[7]/45, idem, add(1)(p32),add(3)(p24),-5,-7,del(9)(q21),=mar[4]; 77%monosomy 7 by FISH | not available | Chemo | N/A      |
| 59 | F | 1.34  | 46,XX                                                                                                                                                                                                                  | not available | HSCT  | Alive    |

^ blast percentage by immunophenotyping when available; IHC, immunohistochemistry
